# Supplementary material for: Salicylic acid-related cotton (Gossypium arboreum) ribosomal protein GaRPL18 contributes to resistance to Verticillium dahliae
Source: PubMed Central journal article supplement (PMC5335750; doi:10.1186/s12870-017-1007-5), 2017-03-03

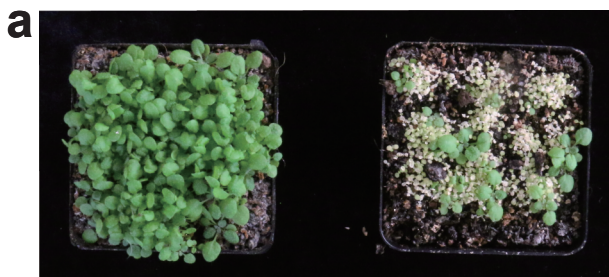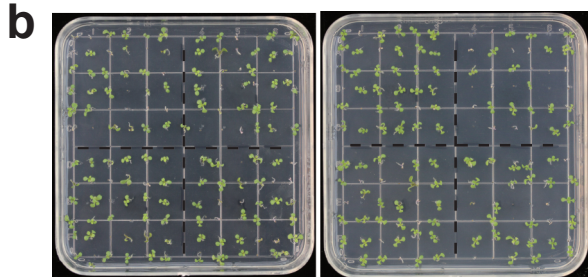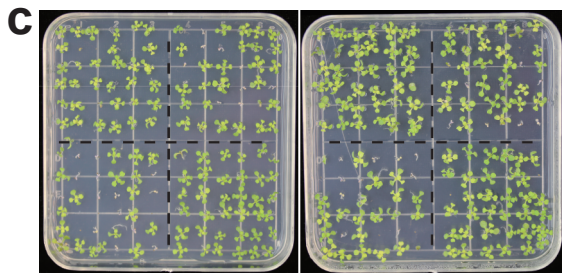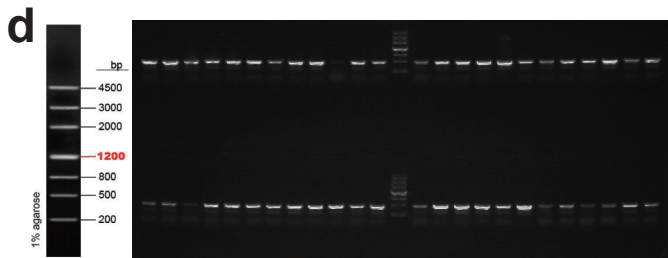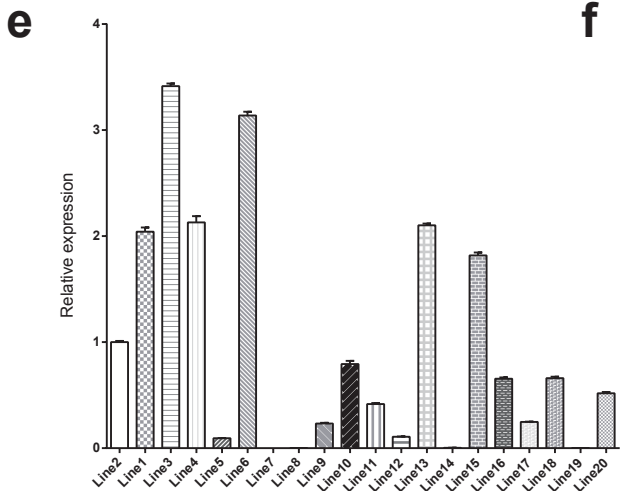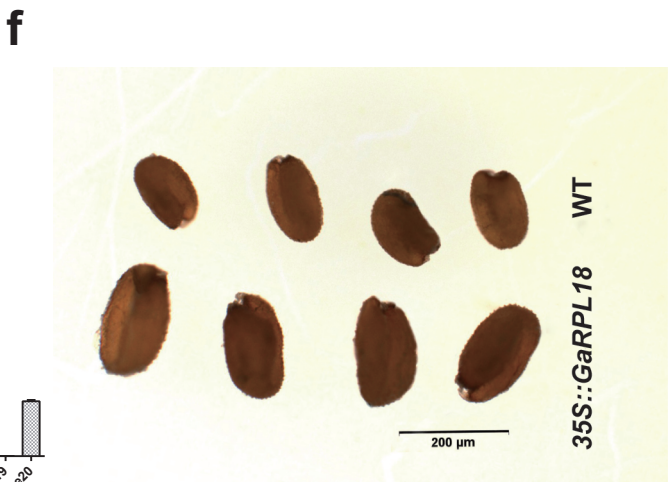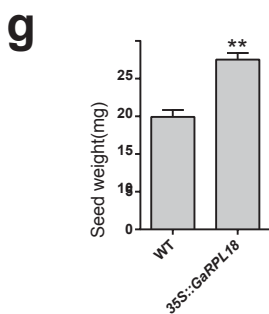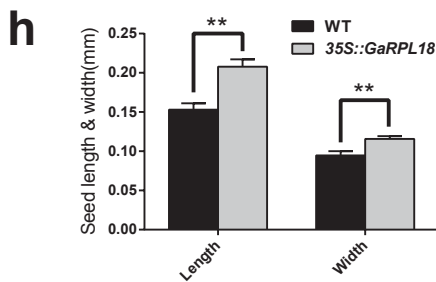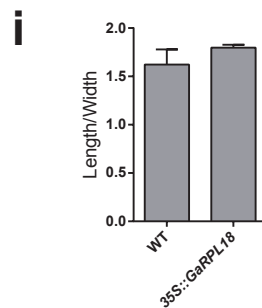

Supplement: 12870_2017_1007_MOESM1_ESM.pdf [file 12870_2017_1007_MOESM1_ESM.pdf]
